# Supplementary material for: Ionic migration induced loss analysis of perovskite solar cells: a poling study
Source: Royal Society of Chemistry journal article supplement (doi:10.1039/d1cp05450c), 2022-01-01
Supplement: d1cp05450c1.pdf [file d1cp05450c1.pdf]

## Supplementary materials

**Table S1.** Photovoltaic electrical parameters of PSCs under positive polarizations, calculated from reverse scan.

| Poling conditions | $V_{oc}$ [V] | $J_{sc}$ [mA/cm <sup>2</sup> ] | FF [%] | PCE [%] |
|-------------------|--------------|--------------------------------|--------|---------|
| As-fabricated     | 1.11         | 23.15                          | 77.3   | 19.86   |
| +0.92V            | 1.11         | 22.69                          | 78.0   | 19.64   |
| +0.97V            | 1.11         | 21.53                          | 76.8   | 18.52   |
| +1.02V            | 1.11         | 20.05                          | 74.8   | 16.65   |
| +1.07V            | 1.10         | 17.41                          | 72.7   | 13.93   |
| +1.12V            | 1.09         | 16.32                          | 71.6   | 12.85   |

**Table S2.** Photovoltaic electrical parameters of PSCs under negative polarizations, calculated from reverse scan.

| Poling conditions | $V_{oc}$ [V] | $J_{sc}$ [mA/cm <sup>2</sup> ] | FF [%] | PCE [%] |
|-------------------|--------------|--------------------------------|--------|---------|
| As-fabricated     | 1.10         | 22.70                          | 77.2   | 19.28   |
| -0.92V            | 1.13         | 22.27                          | 73.7   | 18.55   |
| -0.97V            | 1.11         | 21.86                          | 70.5   | 17.11   |
| -1.02V            | 1.08         | 21.31                          | 63.8   | 14.68   |
| -1.07V            | 1.08         | 21.05                          | 60.5   | 13.92   |
| -1.12V            | 1.05         | 20.87                          | 52.0   | 11.39   |

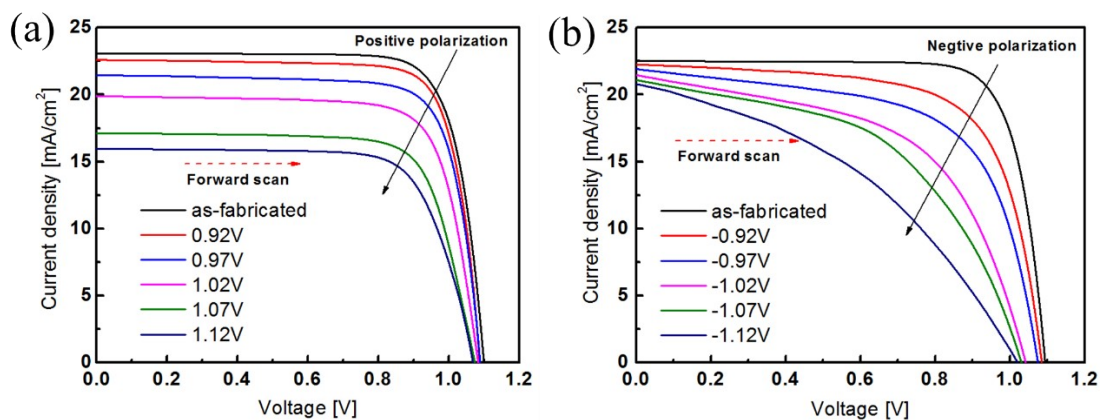

**Figure S1.** J-V curves during forward scan for positively-polarized devices (a) and negatively-polarized devices (b).

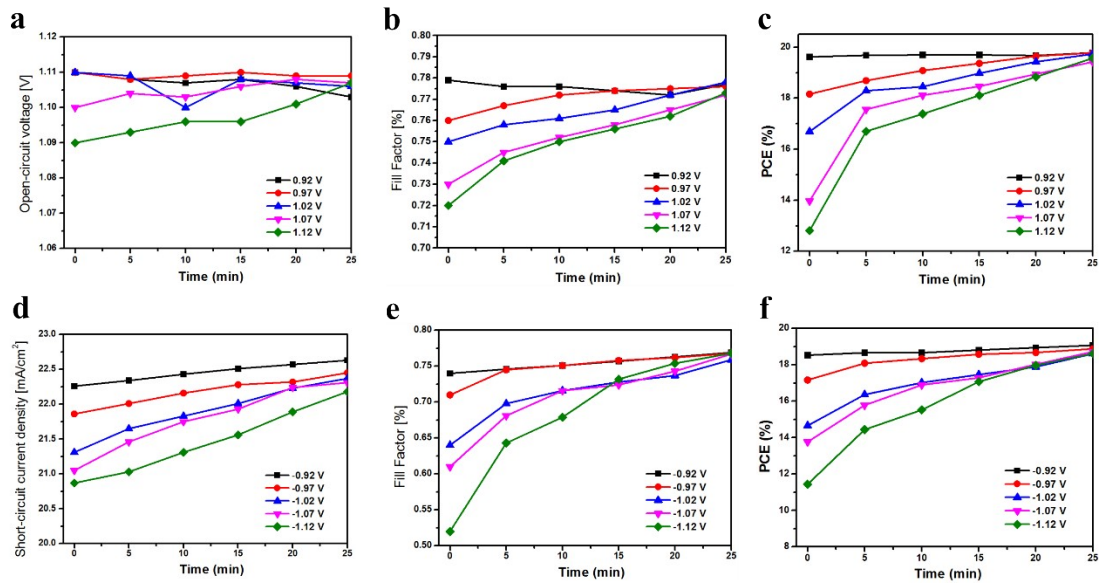

**Figure S2.** Performance recovery of positively-polarized PSCs (a-c); and negatively-polarized PSCs (d-f), calculated from reverse scan.

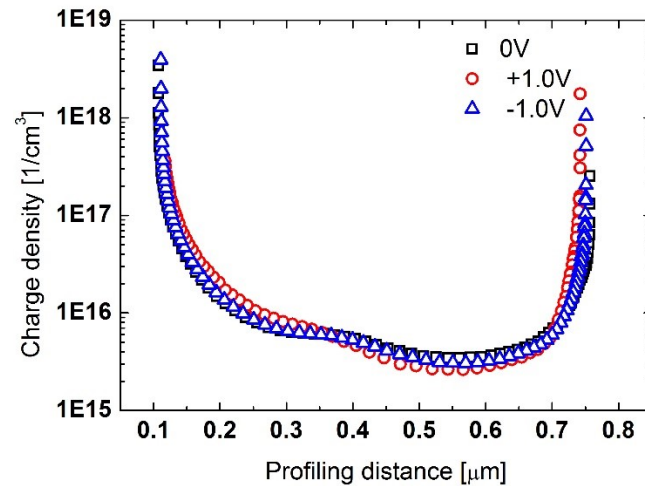

**Figure S3.** Charge density profile for PSCs under various polarizations.

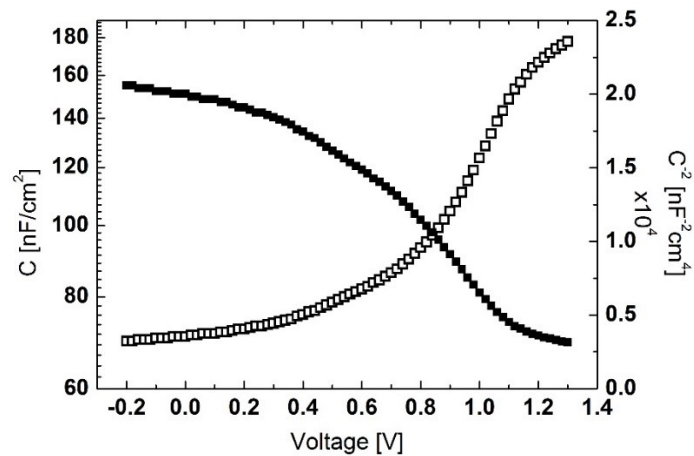

**Figure S4.** Capacitance-voltage characteristics for PSCs measuring from -0.2V to 1.3V, showing full depletion conditions when  $C_{\text{dl}}$  equalizes  $C_{\text{g}}$  at forward bias. The full-depletion condition is achieved under short-circuit conditions.

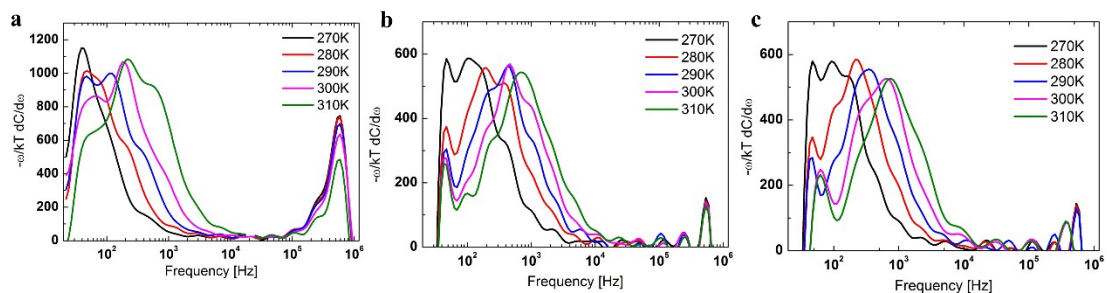

**Figure S5.** Scaled derivate plot ( $-\omega/kT dC/d\omega$ ) as a function of a.c. signal frequency for PSCs under zero, +1.0V and -1.0V bias conditions.

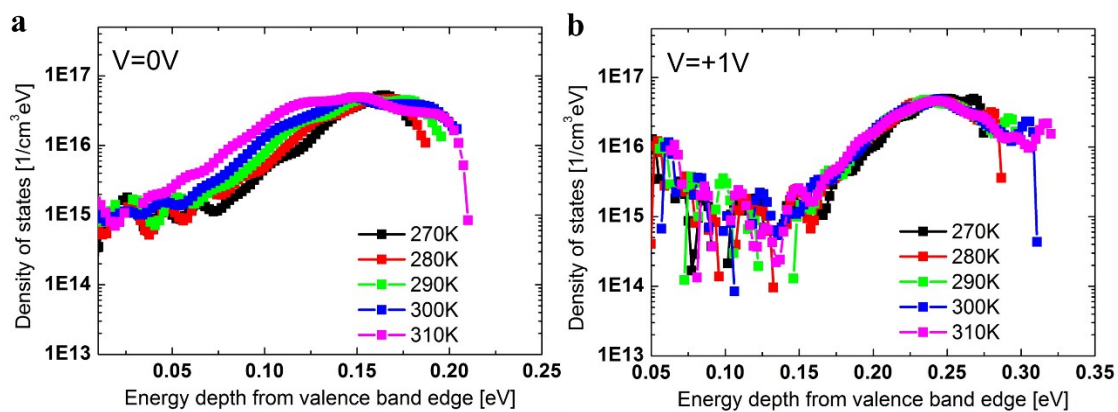

**Figure S6.** Defect density of state profile for PSCs under zero bias a) and positive polarizations b).
